# Supplementary material for: Epoxy nanocomposites filled with thermotropic liquid crystalline epoxy grafted graphene oxide
Source: Royal Society of Chemistry journal article supplement (doi:10.1039/c3ra40404h), 2013-01-01
Supplement: c3ra40404h.pdf [file c3ra40404h.pdf]

## SUPPORTING INFORMATION

# Epoxy Nanocomposites Filled with Thermotropic Liquid Crystalline Epoxy Grafted Graphene Oxide

Shaorong Lu\*, Shanrong Li, Jinhong Yu\*, Zhengkai Yuan, Bo Qi

*Key Laboratory of New Processing Technology for Nonferrous Metals and Materials, Ministry of Education, School of Material Science and Engineering, Guilin University of Technology, Guilin 541004, China.*

\* Corresponding author. Fax: +86-773-5896671. Telephone: +86-773-5896438.

Electronic mail: [yujinhong@glut.edu.cn](mailto:yujinhong@glut.edu.cn) (J.H. Yu), [lushaor@163.com](mailto:lushaor@163.com) (S.R. Lu)

## SUPPLEMENT

The TEM images of the epoxy nanocomposites, as shown in **Figure S1**, help demonstrate the dispersion state of nanoplatelets within matrix in this study.

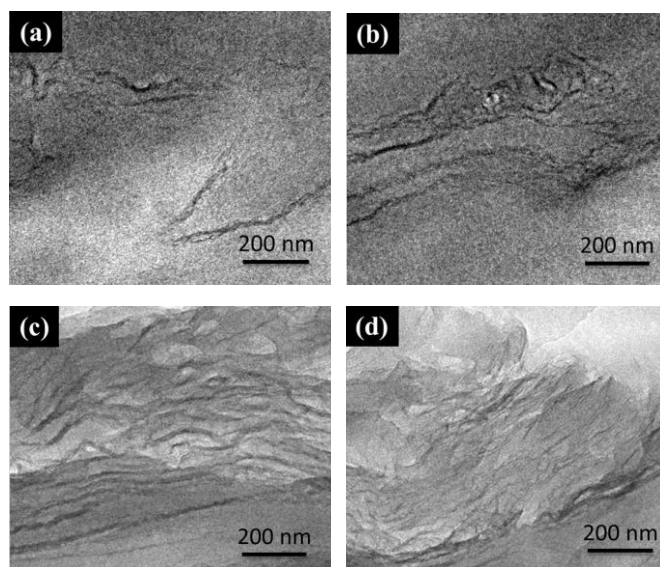

**Figure S1.** TEM images of LCE-g-GO nanocomposites: (a) 1 wt%, (b) 3 wt%, (c) 5 wt%, and (d) 7 wt%.

**Table S1.** Influence of amount of GO on impact and flexural properties of nanocomposites.

| Sample | Impact strength<br>(kJ/m <sup>2</sup> ) | Flexural strength<br>(MPa) | Flexural modulus<br>(MPa) |
|--------|-----------------------------------------|----------------------------|---------------------------|
| 1 wt%  | 12.80(0.22)                             | 116.84(0.29)               | 2104(0.18)                |
| 3 wt%  | 16.50(0.28)                             | 125.06(0.27)               | 2156(0.16)                |
| 5 wt%  | 11.42(0.25)                             | 95.24(0.25)                | 2098(0.19)                |
| 7 wt%  | 5.60(0.26)                              | 87.10(0.31)                | 1870(0.17)                |

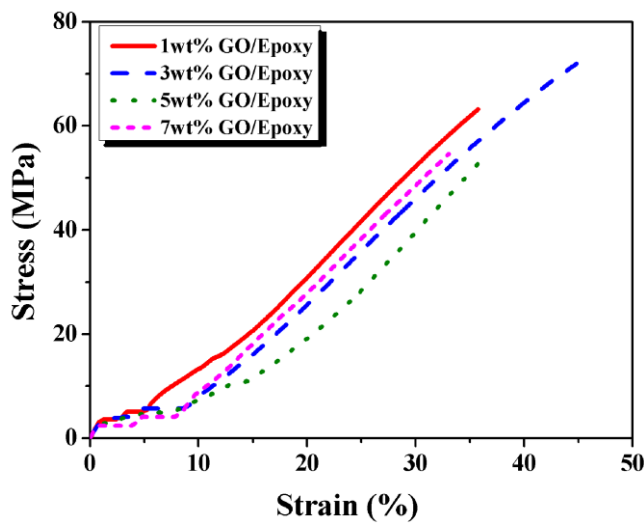

**Figure S2.** Representative tensile stress-strain curves of GO/epoxy nanocomposites.

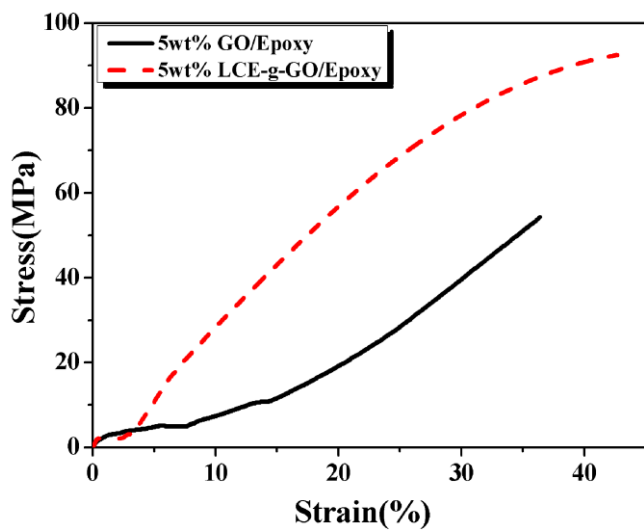

**Figure S3.** Comparison of tensile stress-strain curves between LCE-g-GO/epoxy and GO/epoxy nanocomposites at 5 wt%.
